# Supplementary material
Source: publisher figshare collection journal article supplement (https://asha.figshare.com/articles/dataset/_/5303542)
Supplement: Supplementary file 1 [file 1]

## Supplemental Material S1. Participant biographic demographics.

| Participant | Age (yrs) | Sex | Hand <sup>a</sup> | Education | Time since stroke (mos) | Stroke type |
|-------------|-----------|-----|-------------------|-----------|-------------------------|-------------|
| 1           | 73        | M   | L                 | Age 11    | 18                      | Ischemic    |
| 2           | 61        | M   | R (0.83)          | MA        | 38                      | Ischemic    |
| 3           | 66        | M   | R                 | HS        | 11                      | Ischemic    |
| 4           | 78        | M   | L                 | Age 14    | 20                      | Ischemic    |
| 5           | 48        | F   | R                 | MA        | 10                      | Hemorrhagic |
| 6           | 62        | M   | R                 | MA        | 10                      | Ischemic    |
| 7           | 78        | M   | A                 | Age 17    | 64                      | Ischemic    |
| 8           | 63        | F   | R                 | PhD       | 72                      | Ischemic    |
| 9           | 69        | M   | R                 | HS        | 25                      | Ischemic    |
| 10          | 60        | M   | R                 | Age 16    | 14                      | Ischemic    |
| 11          | 78        | F   | R                 | Age 14    | 9                       | Ischemic    |
| 12          | 75        | M   | R                 | BA        | 19                      | Ischemic    |
| 13          | 69        | M   | R                 | BA        | 22                      | Ischemic    |
| 14          | 78        | M   | R                 | BA        | 12                      | Ischemic    |
| 15          | 73        | M   | R                 | Age 16    | 10                      | Ischemic    |
| 16          | 21        | F   | R                 | HS        | 15                      | Ischemic    |
| 17          | 47        | M   | R                 | HS        | 12                      | Ischemic    |
| 18          | 42        | F   | R                 | HS        | 13                      | Ischemic    |
| 19          | 81        | M   | R                 | Age 16    | 19                      | Ischemic    |
| 20          | 62        | M   | R                 | PhD       | 16                      | Ischemic    |
| 21          | 61        | M   | R                 | Age 16    | 22                      | Hemorrhagic |
| 22          | 78        | M   | R                 | MA        | 19                      | Ischemic    |
| 23          | 65        | F   | R                 | Age 15    | 24                      | Ischemic    |
| 24          | 71        | M   | R                 | Age 15    | 59                      | Ischemic    |
| 25          | 71        | M   | R                 | Age 15    | 111                     | Ischemic    |
| 26          | 79        | M   | L                 | HS        | 8                       | Ischemic    |
| 27          | 49        | F   | R                 | BA        | 20                      | Ischemic    |
| 28          | 70        | M   | R (0.4)           | HS        | 29                      | Ischemic    |
| 29          | 70        | M   | R                 | Age 16    | 87                      | Ischemic    |
| 30          | 55        | M   | A (0.16)          | MA        | 49                      | Ischemic    |
| 31          | 45        | F   | R                 | MA        | 20                      | Ischemic    |
| 32          | 54        | M   | R                 | MA        | 48                      | Ischemic    |
| 33          | 65        | M   | R                 | HS        | 23                      | Ischemic    |
| 34          | 53        | F   | R                 | BA        | 36                      | Ischemic    |
| 35          | 55        | M   | R                 | HS        | 48                      | Ischemic    |
| 36          | 87        | F   | R (0.85)          | BA        | 13                      | Ischemic    |
| 37          | 75        | F   | L                 | BA        | 66                      | Hemorrhagic |
| 38          | 65        | F   | R                 | Age 12    | Not recorded            | Ischemic    |

*Note.* L = left; R = right; A = ambidextrous; HS = finished high school; BA = bachelor’s degree; MA = master’s degree; PhD = doctorate degree. <sup>a</sup>In brackets: the score achieved on the

Edinburgh Handedness Inventory for ambidextrous participants, where  $(-1)$  = *strongly left-handed*,  $(1)$  = *strongly right-handed*, and  $(0)$  = *completely ambidextrous*.
