# Supplementary material
Source: publisher figshare collection journal article supplement (https://asha.figshare.com/articles/dataset/_/5303542)
Supplement: Supplementary file 2 [file 1]

## Supplemental Material S2. Percentage correct from inner speech and overt speech examination for all participants and their group of classification.

| Participant | Inner rhyme | Inner homophone | Overt rhyme | Overt homophone | Group          |
|-------------|-------------|-----------------|-------------|-----------------|----------------|
| 1           | 70%         | No score        | No score    | 50%             | Not classified |
| 2           | No score    | 60%             | No score    | 63%             | Not classified |
| 3           | No score    | 63%             | No score    | 73%             | Not classified |
| 4           | 63%         | No score        | No score    | 50%             | Not classified |
| 5           | 93%         | 80%             | 83%         | 93%             | GOS            |
| 6           | 97%         | 100%            | 100%        | 100%            | GOS            |
| 7           | 63%         | 63%             | 0%          | 0%              | POS            |
| 8           | 83%         | 90%             | 100%        | 67%             | GOS            |
| 9           | 87%         | 95%             | 97%         | 90%             | GOS            |
| 10          | 90%         | 98%             | 97%         | 85%             | GOS            |
| 11          | 97%         | 98%             | 93%         | 100%            | GOS            |
| 12          | 83%         | 63%             | 47%         | 53%             | POS            |
| 13          | 47%         | 26%             | 0%          | 0%              | Not classified |
| 14          | 63%         | 67%             | 17%         | 0%              | POS            |
| 15          | 93%         | 90%             | 97%         | 98%             | GOS            |
| 16          | 82%         | 43%             | 93%         | 40%             | GOS            |
| 17          | 67%         | 97%             | 100%        | 97%             | GOS            |
| 18          | 63%         | 60%             | 53%         | 53%             | GOS            |
| 19          | 63%         | 27%             | 0%          | 0%              | POS            |
| 20          | 90%         | 100%            | 90%         | 93%             | GOS            |
| 21          | 43%         | 24%             | 0%          | 0%              | Not classified |
| 22          | No score    | No score        | No score    | No score        | Not classified |
| 23          | 73%         | 100%            | 93%         | 93%             | GOS            |
| 24          | 51%         | 65%             | 0%          | 0%              | POS            |
| 25          | 93%         | 78%             | 0%          | 0%              | POS            |
| 26          | 93%         | 98%             | 97%         | 100%            | GOS            |
| 27          | 93%         | 48%             | 97%         | 100%            | GOS            |
| 28          | 90%         | 85%             | 100%        | 98%             | GOS            |
| 29          | No score    | 32%             | No score    | No score        | Not classified |
| 30          | 73%         | 87%             | 100%        | 95%             | GOS            |
| 31          | 70%         | 87%             | 100%        | 97%             | GOS            |
| 32          | 73%         | 73%             | 0%          | 0%              | POS            |
| 33          | 83%         | 71%             | 100%        | 57%             | GOS            |
| 34          | 55%         | 47%             | 0%          | 0%              | POS            |
| 35          | No score    | No score        | No score    | No score        | Not classified |
| 36          | 70%         | 77%             | 73%         | 55%             | GOS            |
| 37          | 90%         | 93%             | 90%         | 85%             | GOS            |
| 38          | 67%         | 60%             | 72%         | 52%             | GOS            |

*Note.* POS = poor overt speech group; GOS = good overt speech group.
