# Supplementary material
Source: publisher figshare collection journal article supplement (https://asha.figshare.com/articles/dataset/_/5303542)
Supplement: Supplementary file 3 [file 1]

## Supplemental Material S3. Rhyming and homophone stimuli for inner speech.

| Rhyme             |                   | Homophone         |                   |
|-------------------|-------------------|-------------------|-------------------|
| List 1            | List 2            | List 1            | List 2            |
| 1. Town / Gown    | 1. Pleat / Treat  | 1. Wime / Waime   | 1. Byme / Bime    |
| 2. Rush / Gush    | 2. Ghost / Roast  | 2. Fick / Phic    | 2. Quib / Kwib    |
| 3. Boot / Flute   | 3. Creak / Break  | 3. Bick / Blic    | 3. Zoar / Zure    |
| 4. Pea / Play     | 4. Paw / Hour     | 4. Coim / Koym    | 4. Peam / Pame    |
| 5. Sort / Part    | 5. Match / Hatch  | 5. Voar / Vore    | 5. Scad / Skad    |
| 6. Wart / Fort    | 6. Hive / Dive    | 6. Zoal / Zole    | 6. Thib / Shib    |
| 7. Hush / Bush    | 7. Bowl / Mole    | 7. Hain / Hine    | 7. Grex / Geks    |
| 8. Sauce / Worse  | 8. Flair / Year   | 8. Phex / Ffeks   | 8. Heem / Heam    |
| 9. Bone / Cone    | 9. Tone / Gone    | 9. Shad / Chad    | 9. Tain / Tane    |
| 10. Bond / Hand   | 10. Zoo / Thou    | 10. Noal / Nool   | 10. Foym / Fyme   |
| 11. Tint / Pint   | 11. Low / Toe     | 11. Bury / Berry  | 11. Prey / Pray   |
| 12. Tweak / Freak | 12. Down / Flown  | 12. Sea / See     | 12. Pail / Pale   |
| 13. Dull / Hull   | 13. Comb / Gnome  | 13. Frey / Fey    | 13. Pout / Port   |
| 14. Call / Ball   | 14. Rose / Lose   | 14. Route / Root  | 14. Peach / Poach |
| 15. Pool / Wool   | 15. Mint / Hint   | 15. Earn / Urn    | 15. Some / Sum    |
| 16. Four / Saw    | 16. Bait / Skate  | 16. Kill / Sill   | 16. Maid / Made   |
| 17. Wand / Pond   | 17. Horse / Force | 17. Fury / Ferry  | 17. Pear / Pair   |
| 18. Jute / Foot   | 18. Glove / Wove  | 18. Beach / Beech | 18. New / No      |
| 19. Food / Blood  | 19. Card / Ward   | 19. Pour / Pore   | 19. Sew / So      |
| 20. Bear / Chair  | 20. Gull / Full   | 20. Ear / Oar     | 20. Dough / Doe   |
| 21. Boast / Cost  | 21. Fall / Shall  | 21. Might / Mite  | 21. Dual / Jewel  |
| 22. Batch / Watch | 22. Doe / Cow     | 22. Sail / Soil   | 22. Shoot / Soot  |
| 23. Shoe / Screw  | 23. Love / Dove   | 23. Row / Rough   | 23. Neigh / Nigh  |
| 24. Cheat / Sweat | 24. Date / Plait  | 24. Raid / Ride   | 24. Pea / Pie     |
| 25. Head / Bed    | 25. Sea / Quay    | 25. Weigh / Way   | 25. Break / Brake |
| 26. Chew / Hoe    | 26. Wed / Bead    | 26. Flay / Flee   | 26. Dear / Dare   |
| 27. Five / Give   | 27. Dome / Bomb   | 27. Weak / Wake   | 27. Duet / Cruet  |
| 28. Fool / Tool   | 28. Yard / Hard   | 28. Cell / Sell   | 28. Sore / Saw    |
| 29. Pose / Prose  | 29. You / Two     | 29. Bore / Bow    | 29. Sight / Sigh  |
| 30. Hole / Owl    | 30. Mood / Brood  | 30. Quay / Key    | 30. Home / Hum    |
